# Supplementary material for: Unexpected dissociation energetics of the Na+ counterion from GC motifs in DNA hole-migration
Source: Royal Society of Chemistry journal article supplement (doi:10.1039/b927202j), 2010-01-01
Supplement: b927202j.pdf [file b927202j.pdf]

# Unexpected Dissociation Energetics of Na<sup>+</sup> Counterion from GC Motifs in DNA Hole Migration

Jun Wang, Huifang Li, Liang Zhang, Yuxiang Bu\*

*The Center for Modeling & Simulation Chemistry, Institute of Theoretical  
Chemistry, Shandong University, Jinan, 250100, P. R. China*

## Supporting information:

### 1. Molecular Dynamics Simulation Detail

To obtain the DNA configurations in which Na<sup>+</sup> ions, the counterions, directly interact with individual base pair, molecular dynamics (MD) simulations were carried out on a designed DNA decamer with the sequence d(AGGAGACCAA) with W-C pairing to make the corresponding duplex, with use of the AMBER 8.0 suite<sup>S1</sup> of programs and the parm99 force field.<sup>S2</sup> Each structure was neutralized with 18 Na<sup>+</sup> ions and solvated with about 3000 TIP3P<sup>S3</sup> water molecules in a truncated octahedral box whose edges are approximately 10 Å in each direction from the closest decamer duplex. No salt was included. The SHAKE algorithm<sup>S4</sup> was employed to constrain all bonds involving hydrogens. After energy minimization to relax strains, the system was slowly heated from 0 to 300 K during 20 ps with harmonic restraints of 10.0 kcal/mol/Å<sup>2</sup> on the solute atoms, at constant volume. This was followed by another 300-ps MD run in which the restraints were gradually removed.<sup>S5</sup> After these equilibration procedures, 10 ns unrestrained molecular dynamics simulations were then carried out at constant pressure (1 atm) and temperature (300K) using the Particle Mesh Ewald algorithm<sup>S6</sup> and periodic boundary conditions.

The extended 10 ns long sampling was carried out to assess whether mobile Na<sup>+</sup> counterions can penetrate into the DNA groove and bind to a given base pair during the MD trajectory. The MD trajectory analysis revealed that the mobile Na<sup>+</sup> counterions are quite mobile. A Na<sup>+</sup> counterion was observed to penetrate into the major groove of the decamer to combine directly with purine residue during the first 6 ns of MD simulation and, subsequently, this Na<sup>+</sup> counterion slowly departed from the binding site. The DNA structures, including the presence or absence of Na<sup>+</sup> counterions at particular locations, were saved every 0.5 ps during the simulations for further

minimizations of the Na<sup>+</sup>-coupled configurations.

- S1. Case, D. A.; Darden, T. A.; Cheatham, T. E. III; Simmerling, C. L.; Wang, J.; Duke, R. E.; Luo, R.; Merz, K. M.; Wang, B.; Pearlman, D. A.; Crowley, M.; Brozell, S.; Tsui, V.; Gohlke, H.; Mongan, J.; Hornak, V.; Cui, G.; Beroza, P.; Schafmeister, C.; Caldwell, J. W.; Ross, W. S.; Kollman, P. A. *AMBER 8*; University of California: San Francisco, **2004**.
- S2. (a) Cornell, W. D.; Cieplak, P.; Bayly, C. I.; Gould, I. R.; Merz, K. M.; Ferguson, D. M.; Spellmeyer, D. C.; Fox, T.; Caldwell, J. W.; Kollman, P. A. *J. Am. Chem. Soc.* **1995**, *117*, 5179-5197. (b) Wang, J.; Cieplak, P.; Kollman, P. A. *J. Comput. Chem.* **2000**, *21*, 1049-1074.
- S3. Jorgensen, W. L.; Chandrasekhar, J.; Madura, J. D.; Impey, R. W.; Klein, M. L. *J. Chem. Phys.* **1983**, *79*, 926-936.
- S4. Ryckaert, J. P.; Ciccotti, G.; Berendsen, H. J. C. *J. Comput. Phys.* **1977**, *23*, 327-336.
- S5. Auffinger, P.; Westhof, E. *J. Mol. Biol.* **2000**, *300*, 1113-1131.
- S6. Darden, T.; York, D.; Pedersen, L. *J. Chem. Phys.* **1993**, *98*, 10089-10092.

## 2. Relevant Figures

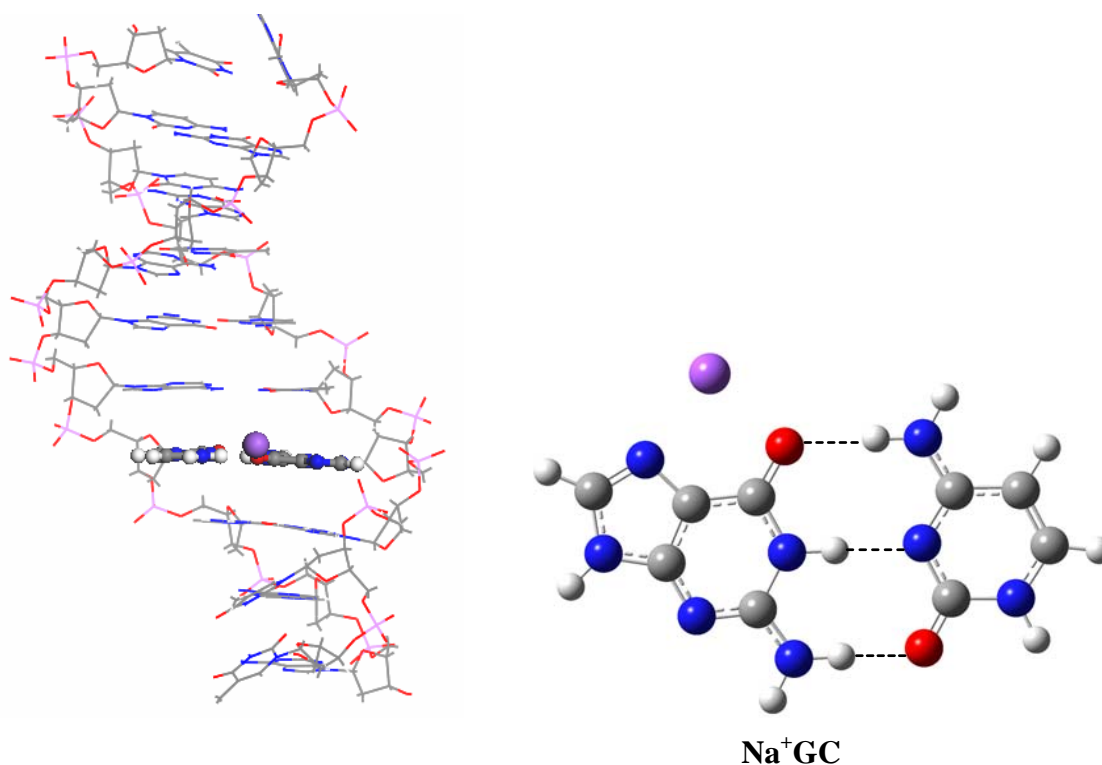

**Figure S-1.** Averaged DNA structure (*left*) obtained from MD trajectory averaged over a 10-ps MD run when a Na<sup>+</sup> binds with a base. **MD-Na<sup>+</sup>GC** was obtained from MD simulations on the d(AGGAGACCAA). The given Watson-Crick base pair bound with a Na<sup>+</sup> counterion is highlighted by ball and stick type in duplex, and also given in the top-view (*right*). The Na<sup>+</sup> counterion penetrating into the major groove with direct interaction with a Watson-Crick pair is represented as a big purple ball.

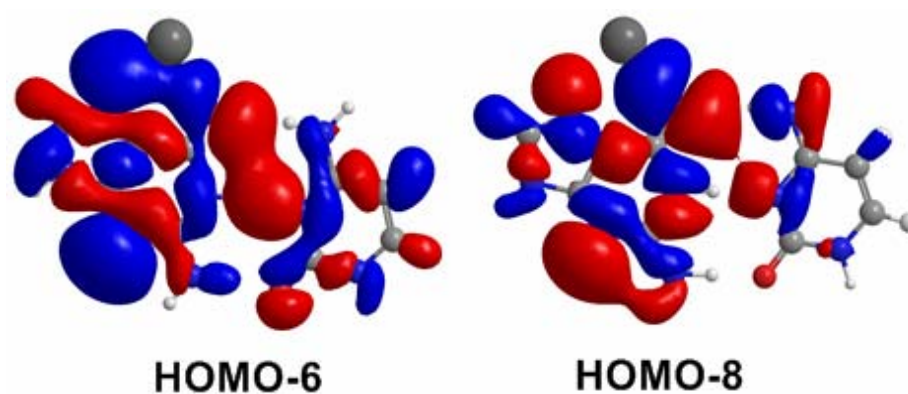

**Figure S-2.** The maps of two molecular orbitals (HOMO-6 and HOMO-8) for the Na<sup>+</sup>G<sup>+</sup>C complex. HOMO denotes the highest occupied molecular orbital.

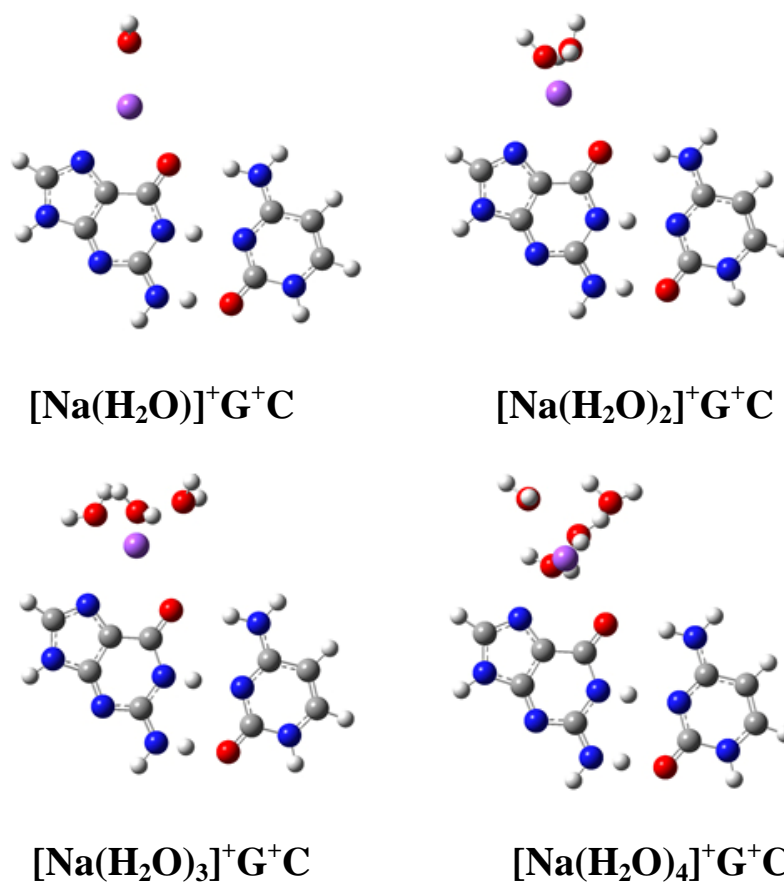

**Figure S-3.** The optimized structures of the [Na(H<sub>2</sub>O)<sub>n</sub>]<sup>+</sup>G<sup>+</sup>C (n=1, 2, 3, 4) complexes, obtained at the B3LYP/6-311++G\*\* level.

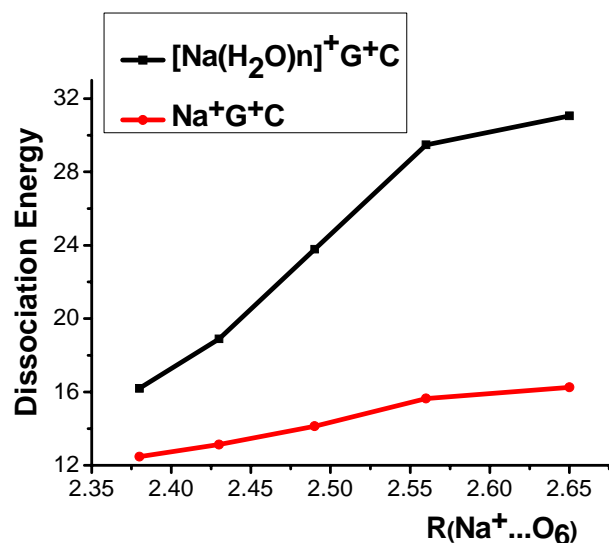

**Figure S-4.** Effects of  $R_{\text{Na}^+\dots\text{O}_6}$  (the distance between  $\text{Na}^+$  and  $\text{O}_6$ ) on  $\Delta E_1$ , the dissociation energies of the  $\text{Na}^+-\text{N}_7/\text{O}_6$  bonds in all considered complexes:  $\text{Na}^+\text{G}^+\text{C}$  and its corresponding hydrates  $[\text{Na}(\text{H}_2\text{O})_n]^+\text{G}^+\text{C}$  ( $n=1, 2, 3, 4$ ), and  $\Delta E_2$ , the vertical dissociation energies of the  $\text{Na}^+-\text{N}_7/\text{O}_6$  bonds in  $\text{Na}^+\text{G}^+\text{C}$ , viz.  $[\text{Na}(\text{H}_2\text{O})_n]^+\text{G}^+\text{C}$  for  $n=0$  (no water molecules attached). All data for this figure is given in Table S-5.

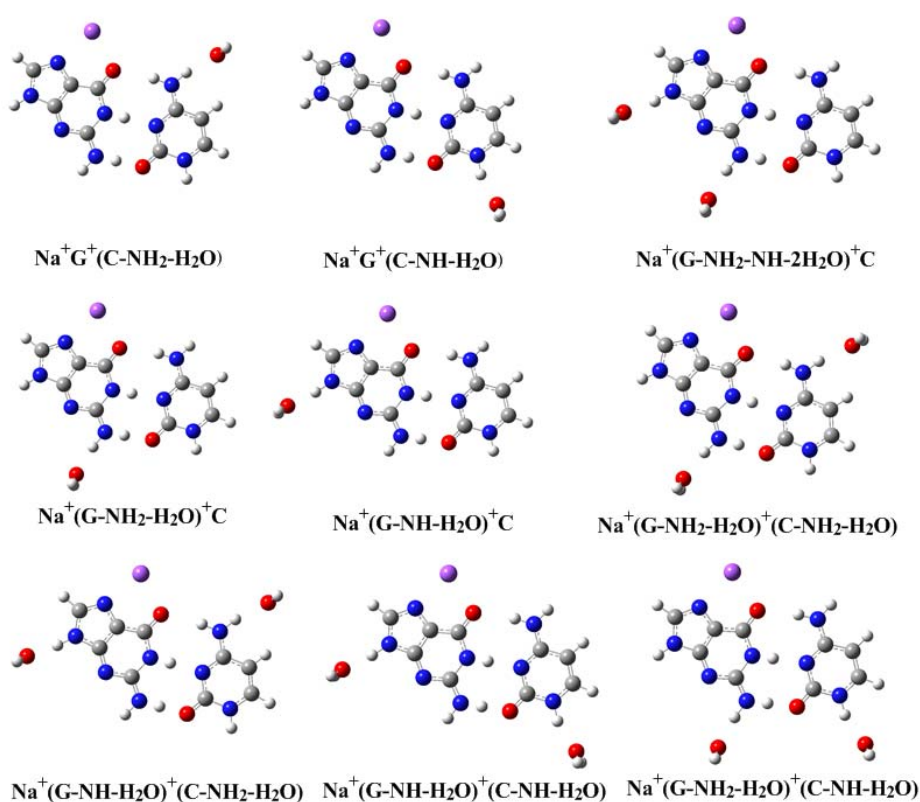

**Figure S-5.** The optimized structures of the  $\text{Na}^+[\text{G}-\text{R}(\text{H}_2\text{O})_n]^+[\text{C}-\text{R}(\text{H}_2\text{O})_n]$  ( $\text{R}=\text{NH}_2, \text{NH}$ ;  $n=0, 1, 2$ ) complexes, the hydrates of  $\text{Na}^+\text{G}^+\text{C}$ , obtained at the B3LYP/6-311++G\*\* level.

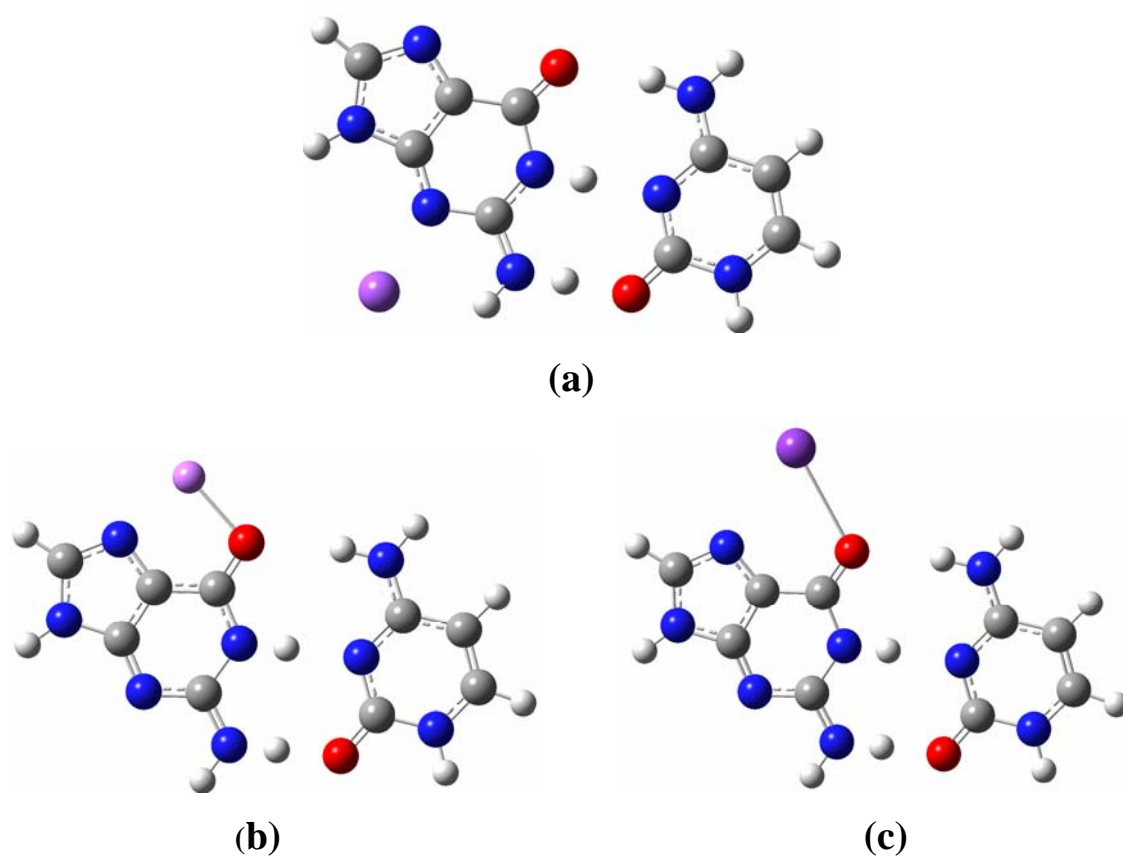

**Figure S-6.** The optimized structures: (a) Na<sup>+</sup>G<sup>+</sup>C-min, (b) Li<sup>+</sup>G<sup>+</sup>C, and (c) K<sup>+</sup>G<sup>+</sup>C, obtained at the B3LYP/6-311++G\*\* level. The complex Na<sup>+</sup>G<sup>+</sup>C-min denotes the hole-trapped one when Na<sup>+</sup> resides in the minor groove of the DNA duplex, while Li<sup>+</sup>G<sup>+</sup>C and K<sup>+</sup>G<sup>+</sup>C are the corresponding hole-trapped those when Li<sup>+</sup>, or K<sup>+</sup> resides in the major groove of the DNA duplex.

### 3. Relevant Tables

**Table S-1:** The dissociation energies ( $\Delta E$ s) of  $\text{Na}^+-\text{N}_7/\text{O}_6$  bond and Watson-Crick H-bond (WC HB) in these complexes  $\text{Na}^+\text{GC}$ ,  $\text{Na}^+\text{G}^+\text{C}$ , and  $\text{Na}^+\text{G}(-\text{H}^+)\text{C}_p$  at the B3LYP/6-311++G\*\* level (Method 1), and those dissociation energies of  $\text{Na}^+\text{G}^+\text{C}$  were also calculated at the MP2/6-311++G\*\*//MP2/6-31+G\* level (Method 2) and M05-2X/6-311++G\*\* level (Method 3) for comparison.

| Complexes |                            | $\text{Na}^+\text{GC}$                   | $\text{Na}^+\text{G}^+\text{C}$ | $\text{Na}^+\text{G}(-\text{H}^+)\text{C}_p$ |        |
|-----------|----------------------------|------------------------------------------|---------------------------------|----------------------------------------------|--------|
| Method 1  | $\Delta E^a$               | $\text{Na}^+-\text{N}_7/\text{O}_6$ bond | 62.30                           | -15.49                                       | -6.38  |
|           |                            | WC HB                                    | 30.70                           | 53.56                                        | -16.32 |
|           | $\Delta E_{\text{bsse}}^b$ | $\text{Na}^+-\text{N}_7/\text{O}_6$ bond | 61.51                           | -16.18                                       | -7.15  |
|           |                            | WC HB                                    | 29.57                           | 52.32                                        | -18.14 |
| Method 2  | $\Delta E^a$               | $\text{Na}^+-\text{N}_7/\text{O}_6$ bond |                                 | -18.03                                       |        |
|           |                            | WC HB                                    |                                 | 51.96                                        |        |
|           | $\Delta E_{\text{bsse}}^b$ | $\text{Na}^+-\text{N}_7/\text{O}_6$ bond |                                 | -19.35                                       |        |
|           |                            | WC HB                                    |                                 | 47.64                                        |        |
| Method 3  | $\Delta E^a$               | $\text{Na}^+-\text{N}_7/\text{O}_6$ bond |                                 | -15.20                                       |        |

Notes:  $\Delta E^a$  are the dissociation energies,  $\Delta E_{\text{bsse}}^b$  are the BSSE-corrected ones. All of the dissociation energies are in kcal/mol.

**Table S-2:** AIM parameters  $\rho$  (the electron density) and Lap (the Laplacian of electron density) for the  $\text{Na}^+\text{GC}$  and  $\text{Na}^+\text{G}^+\text{C}$  complexes.  $\rho$  and Lap are in atomic units.

| Chemical bond                      | $\text{Na}^+\text{GC}$ |        | $\text{Na}^+\text{G}^+\text{C}$ |        |
|------------------------------------|------------------------|--------|---------------------------------|--------|
|                                    | $\rho$                 | Lap    | $\rho$                          | Lap    |
| $\text{Na}^+\dots\text{N}_7$       | 0.0225                 | 0.1330 | 0.0161                          | 0.0869 |
| $\text{Na}^+\dots\text{O}_6$       | 0.0245                 | 0.1500 | 0.0184                          | 0.1050 |
| $\text{O}_6\dots\text{H}-\text{N}$ | 0.0251                 | 0.0790 | 0.0152                          | 0.0508 |
| $\text{N}_1-\text{H}\dots\text{N}$ | 0.0366                 | 0.0971 | 0.0479                          | 0.1140 |
| $\text{N}_2-\text{H}\dots\text{O}$ | 0.0374                 | 0.1230 | 0.0761                          | 0.2058 |

**Table S-3:** The dissociation energies ( $\Delta E$ s) of the  $\text{Na}^+\text{G}^+\text{C}$ -min,  $\text{Li}^+\text{G}^+\text{C}$ , and  $\text{K}^+\text{G}^+\text{C}$  complexes according to the dissociation mode,  $\text{M}^+\text{G}^+\text{C} \rightarrow \text{G}^+\text{C} + \text{M}^+$  ( $\text{M}^+ = \text{Li}^+, \text{Na}^+$  or  $\text{K}^+$ ). The  $\text{Na}^+\text{G}^+\text{C}$ -min complex denotes the hole-trapped one when  $\text{Na}^+$  resides in the minor groove of the DNA duplex, while  $\text{Li}^+\text{G}^+\text{C}$  and  $\text{K}^+\text{G}^+\text{C}$  are the hole-trapped those when  $\text{Li}^+$ , or  $\text{K}^+$  resides in the major groove of the DNA duplex, respectively.

| complexes                            | B3LYP/6-311++G** |                                     |
|--------------------------------------|------------------|-------------------------------------|
|                                      | $\Delta E$       | $\Delta E_{\text{BSSE}}^{\text{a}}$ |
| $\text{Na}^+\text{G}^+\text{C}$ -min | -44.33           | -44.89                              |
| $\text{Li}^+\text{G}^+\text{C}$      | -3.12            | -3.69                               |
| $\text{K}^+\text{G}^+\text{C}$       | -24.39           | -24.64                              |

<sup>a</sup> the dissociation energies corrected with basis set superposition error (BSSE). All the dissociation energies are in kcal/mol.

**Table S-4:**  $R_{\text{Na}^+\dots\text{O}_6}$  (the distance between  $\text{Na}^+$  and  $\text{O}_6$ ), attraction (interaction between  $\text{Na}^+$  and GC in  $\text{Na}^+\text{GC}$ ), added electrostatic repulsion (the increased electrostatic repulsion upon one-electron oxidation).

| $R_{\text{Na}^+\dots\text{O}_6}$ | Attraction | Added electrostatic repulsion |
|----------------------------------|------------|-------------------------------|
| (angstroms)                      |            | kcal/mol                      |
| 2.38                             | -65.06     | 77.53                         |
| 2.68                             | -61.64     | 75.51                         |
| 2.98                             | -56.86     | 73.35                         |
| 3.28                             | -51.57     | 70.96                         |
| 3.58                             | -46.05     | 68.24                         |
| 3.88                             | -40.63     | 65.32                         |
| 4.18                             | -35.51     | 62.32                         |
| 4.48                             | -30.86     | 59.33                         |
| 4.78                             | -26.77     | 56.46                         |
| 5.08                             | -23.25     | 53.77                         |
| 5.38                             | -20.25     | 51.28                         |
| 5.68                             | -17.73     | 48.98                         |
| 5.98                             | -15.62     | 46.89                         |
| 6.28                             | -13.84     | 44.97                         |
| 6.58                             | -12.35     | 43.21                         |

**Table S-5:**  $\Delta E_1$ , the dissociation energies ( $\Delta E$ s) of the  $\text{Na}^+\text{-N}_7/\text{O}_6$  bond in these complexes:  $\text{Na}^+\text{G}^+\text{C}$  and its corresponding hydrates  $[\text{Na}(\text{H}_2\text{O})_n]^+\text{G}^+\text{C}$  ( $n=1, 2, 3, 4$ );  $\Delta E_2$ , the vertical dissociation energies of the  $\text{Na}^+\text{-N}_7/\text{O}_6$  bond in  $\text{Na}^+\text{G}^+\text{C}$ , viz.  $[\text{Na}(\text{H}_2\text{O})_n]^+\text{G}^+\text{C}$  ( $n=0$ , no water molecules). Both  $\Delta E_1$  and  $\Delta E_2$  are obtained at the B3LYP/6-311++G\*\* level.  $R_{\text{Na}^+\dots\text{O}_6}$  denotes the distance between  $\text{Na}^+$  and  $\text{O}_6$ .

| Complexes                                               | $\Delta E_1$ | $\Delta E_{1(\text{BSSE})}^a$ | $\Delta E_2$ | $R_{\text{Na}^+\dots\text{O}_6}$ |
|---------------------------------------------------------|--------------|-------------------------------|--------------|----------------------------------|
| $\text{Na}^+\text{G}^+\text{C}$                         | -15.49       | -16.19                        | -12.47       | 2.38                             |
| $[\text{Na}(\text{H}_2\text{O})]^+\text{G}^+\text{C}$   | -18.08       | -18.89                        | -13.14       | 2.43                             |
| $[\text{Na}(\text{H}_2\text{O})_2]^+\text{G}^+\text{C}$ | -22.92       | -23.78                        | -14.14       | 2.49                             |
| $[\text{Na}(\text{H}_2\text{O})_3]^+\text{G}^+\text{C}$ | -28.59       | -29.48                        | -15.64       | 2.56                             |
| $[\text{Na}(\text{H}_2\text{O})_4]^+\text{G}^+\text{C}$ | -30.04       | -31.06                        | -16.25       | 2.65                             |

<sup>a</sup> the dissociation energies corrected with the basis set superposition error (BSSE). All of the dissociation energies are in kcal/mol.

**Table S-6:**  $\Delta E$ , the dissociation energies ( $\Delta E$ s) of the  $\text{Na}^+\text{-N}_7/\text{O}_6$  bonds in these complexes:  $\text{Na}^+\text{G}^+\text{C}$  and its corresponding hydrates  $\text{Na}^+[\text{G-R}(\text{H}_2\text{O})_n]^+[\text{C-R}(\text{H}_2\text{O})_n]$  ( $\text{R}=\text{NH}_2, \text{NH}$ ;  $n=1, 2$ ) as shown in **Fig. S-5**;  $\text{R}$  denotes the groups with which water molecules interact.  $\Delta E_s$  are obtained at the B3LYP/6-311++G\*\* level.  $R_{\text{Na}^+\dots\text{O}_6}$  denotes the distance between  $\text{Na}^+$  and  $\text{O}_6$ .

| Complexes                                                                           | $\Delta E$ | $\Delta E_{(\text{BSSE})}^a$ |
|-------------------------------------------------------------------------------------|------------|------------------------------|
| $\text{Na}^+\text{G}^+\text{C}$                                                     | -15.49     | -16.19                       |
| $\text{Na}^+(\text{G-NH}_2\text{-H}_2\text{O})^+\text{C}$                           | -12.43     | -13.15                       |
| $\text{Na}^+(\text{G-NH-H}_2\text{O})^+\text{C}$                                    | -11.74     | -12.46                       |
| $\text{Na}^+\text{G}^+(\text{C-NH}_2\text{-H}_2\text{O})$                           | -10.93     | -11.64                       |
| $\text{Na}^+\text{G}^+(\text{C-NH-H}_2\text{O})$                                    | -10.10     | -10.81                       |
| $\text{Na}^+(\text{G-NH}_2\text{-NH-2H}_2\text{O})^+\text{C}$                       | -7.94      | -8.65                        |
| $\text{Na}^+(\text{G-NH}_2\text{-H}_2\text{O})^+(\text{C-NH}_2\text{-H}_2\text{O})$ | -7.12      | -7.84                        |
| $\text{Na}^+(\text{G-NH}_2\text{-H}_2\text{O})^+(\text{C-NH-H}_2\text{O})$          | -7.61      | -8.36                        |
| $\text{Na}^+(\text{G-NH-H}_2\text{O})^+(\text{C-NH-H}_2\text{O})$                   | -6.79      | -7.51                        |
| $\text{Na}^+(\text{G-NH-H}_2\text{O})^+(\text{C-NH}_2\text{-H}_2\text{O})$          | -5.66      | -6.40                        |

<sup>a</sup> the dissociation energies corrected with the basis set superposition error (BSSE). All of the dissociation energies are in kcal/mol.



**Table S-7:** Various of dissociation energies ( $\Delta E$ s-PCM) using the polarizable continuum (PCM) self-consistent reaction field method when  $\text{Na}^+$  is separated from the complex  $\text{Na}^+\text{G}^+\text{C}$  in the gas phase and ten solvents with different dielectric constants ranging from the gas phase ( $\epsilon=1$ ) to water ( $\epsilon=78.39$ ), RE denotes the released energies in dissociation of  $\text{Na}^+$  from the  $\text{Na}^+\text{G}^+\text{C}$  complex, and  $\epsilon$  denotes dielectric constants.

| solvent       | $\epsilon$ | $\Delta E$ -PCM | RE( $-\Delta E$ ) |
|---------------|------------|-----------------|-------------------|
| gas phase     | 1.00       | -15.49          | 15.49             |
| ether         | 4.22       | -6.57           | 6.57              |
| chlorobenzene | 5.62       | -6.06           | 6.06              |
| aniline       | 6.89       | -5.40           | 5.40              |
| quinoline     | 9.03       | -5.35           | 5.35              |
| acetone       | 20.7       | -3.37           | 3.37              |
| ethanol       | 24.55      | -3.03           | 3.03              |
| methanol      | 32.63      | -2.56           | 2.56              |
| DMSO          | 46.70      | -2.85           | 2.85              |
| water         | 78.39      | -1.66           | 1.66              |
